# Supplementary material for: Multisession Anodal tDCS on the Right Temporo-Parietal Junction Improves Mentalizing Processes in Adults with Autistic Traits
Source: MDPI journal article supplement (doi:10.3390/brainsci12010030), 2021-12-28
Supplement: s1 [file s1]

## **Supplementary Material**

False belief task including response polarity

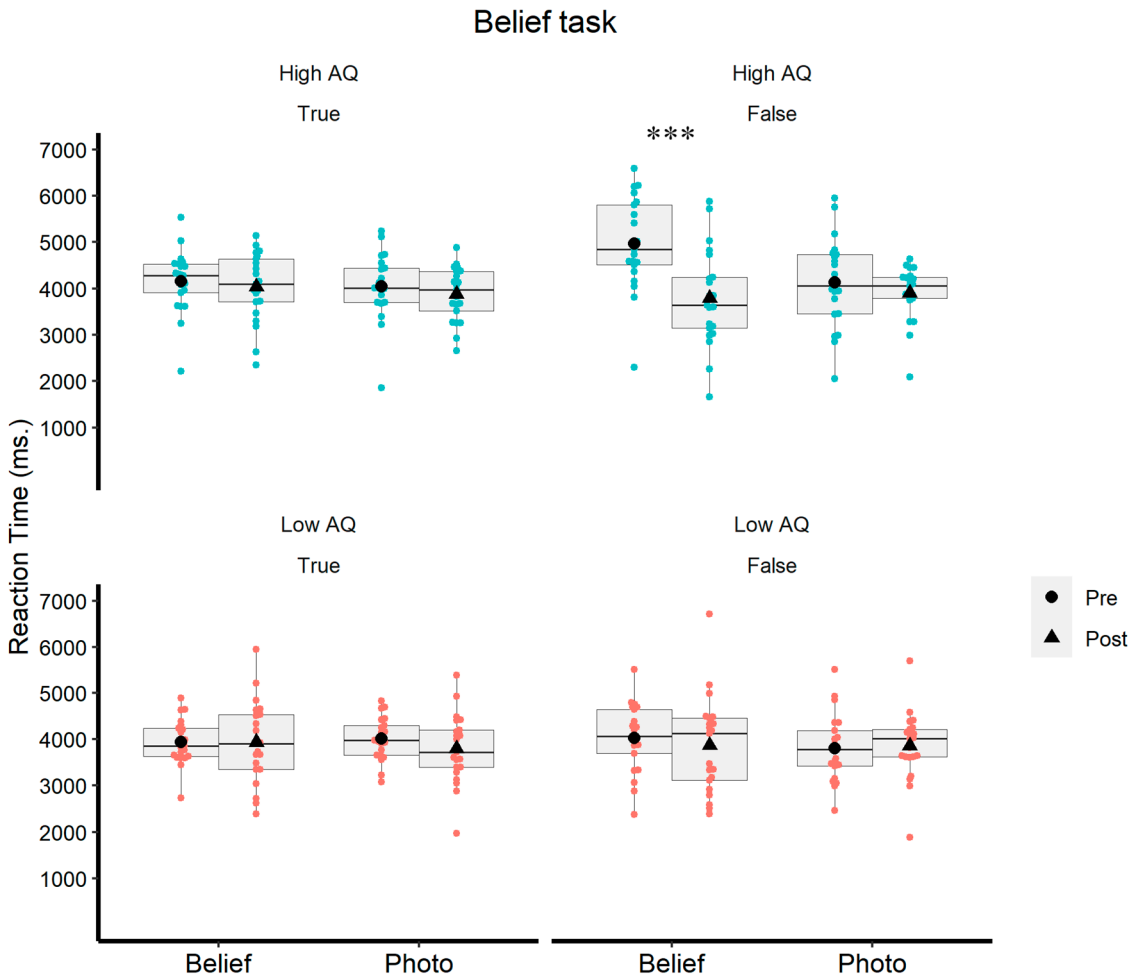

**Figure S1.** Reaction times in the belief tasks, in the high-AQ group (left) and the low-AQ group (right) in response Modality and Test (pre- and post-test).

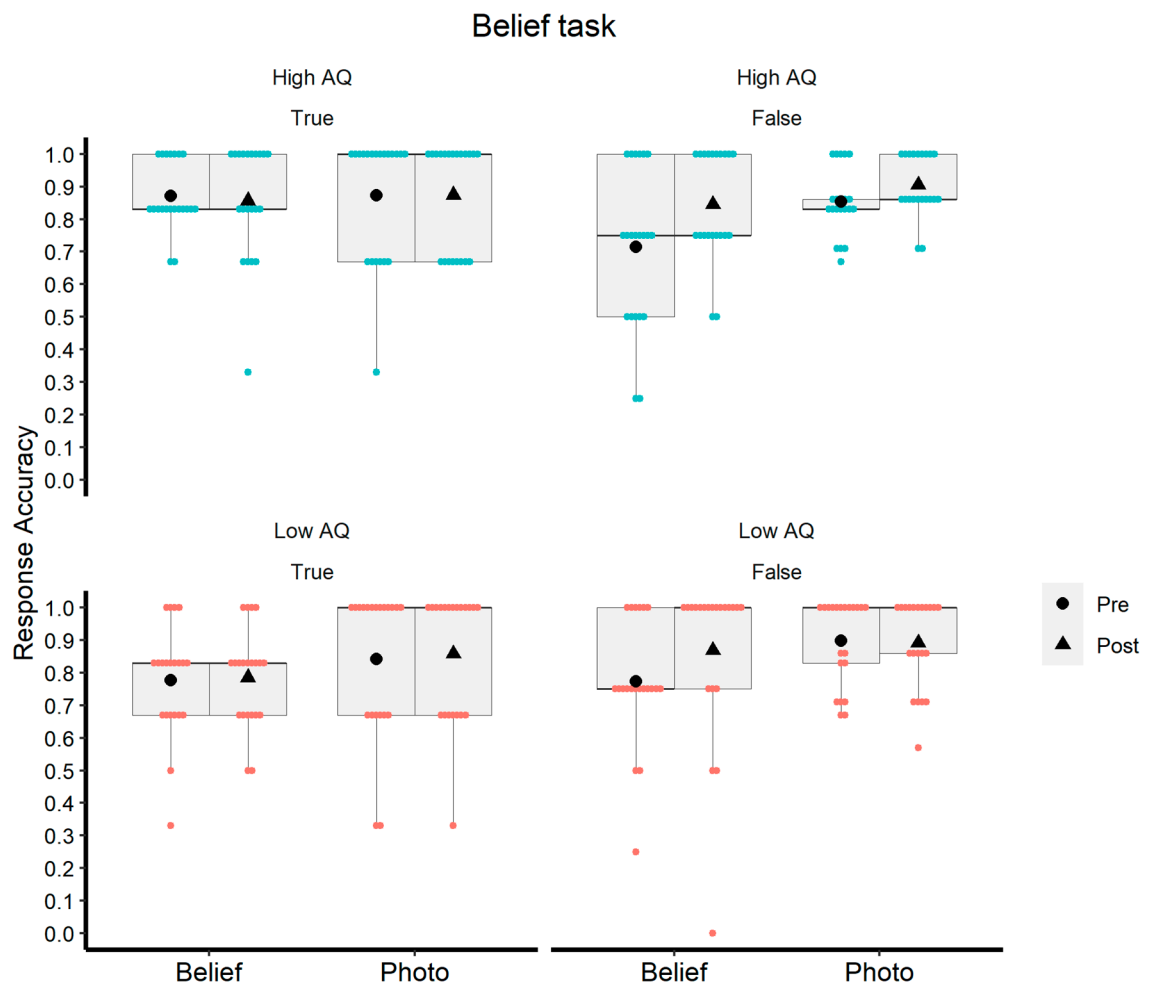

**Figure S2.** Accuracy in the belief tasks, in the high-AQ group (left) and the low-AQ group (right) in response Modality and Test (pre- and post-test).

**Table S1.** Reaction times ANOVA: Group x Test x Response Polarity x Modality

| SOURCE                             | SUM OF SQUARES | DF | MEAN SQUARE | F      | p    | $\eta^2$ |
|------------------------------------|----------------|----|-------------|--------|------|----------|
| TEST                               | 5387126.406    | 1  | 5387126.406 | 16.765 | .000 | .295     |
| TEST * GROUP                       | 2441340.087    | 1  | 2441340.087 | 7.597  | .009 | .160     |
| Error (TEST)                       | 12853546.539   | 40 | 321338.663  |        |      |          |
| POLARITY                           | 401740.067     | 1  | 401740.067  | 1.093  | .302 | .027     |
| POLARITY * GROUP                   | 845969.568     | 1  | 845969.568  | 2.302  | .137 | .054     |
| Error(POLARITY)                    | 14699276.437   | 40 | 367481.911  |        |      |          |
| MODALITY                           | 2228271.702    | 1  | 2228271.702 | 6.092  | .018 | .132     |
| MODALITY * GROUP                   | 613123.423     | 1  | 613123.423  | 1.676  | .203 | .040     |
| Error(MODALITY)                    | 14630736.948   | 40 | 365768.424  |        |      |          |
| TEST * POLARITY                    | 1292562.545    | 1  | 1292562.545 | 4.862  | .033 | .108     |
| TEST * POLARITY * GROUP            | 1943751.330    | 1  | 1943751.330 | 7.312  | .010 | .155     |
| Error(TEST * POLARITY)             | 10633051.052   | 40 | 265826.276  |        |      |          |
| TEST * MODALITY                    | 1100268.509    | 1  | 1100268.509 | 3.014  | .090 | .070     |
| TEST * MODALITY * GROUP            | 1007793.198    | 1  | 1007793.198 | 2.760  | .104 | .065     |
| Error(TEST * MODALITY)             | 14604383.398   | 40 | 365109.585  |        |      |          |
| POLARITY * MODALITY                | 477668.809     | 1  | 477668.809  | 1.512  | .226 | .036     |
| POLARITY * MODALITY * GROUP        | 116560.838     | 1  | 116560.838  | .369   | .547 | .009     |
| Error(POLARITY*MODALITY)           | 12634453.260   | 40 | 315861.331  |        |      |          |
| TEST * POLARITY * MODALITY         | 2652885.092    | 1  | 2652885.092 | 6.673  | .014 | .143     |
| TEST * POLARITY * MODALITY * GROUP | 419044.259     | 1  | 419044.259  | 1.054  | .311 | .026     |
| Error(TEST*POLARITY*MODALITY)      | 15902391.273   | 40 | 397559.782  |        |      |          |

**Table S2.** Accuracy ANOVA: Group x Test x Response Polarity x Modality

| SOURCE                             | SUM OF SQUARES | FD | MEAN SQUARE | F      | Sig. | $\eta^2$ |
|------------------------------------|----------------|----|-------------|--------|------|----------|
| TEST                               | .105           | 1  | .105        | 4.947  | .032 | .110     |
| TEST * GROUP                       | .004           | 1  | .004        | .199   | .658 | .005     |
| Error(TEST)                        | .846           | 40 | .021        |        |      |          |
| POLARITY                           | .000           | 1  | .000        | .005   | .941 | .000     |
| POLARITY * GROUP                   | .140           | 1  | .140        | 4.893  | .033 | .109     |
| Error(POLARITY)                    | 1.148          | 40 | .029        |        |      |          |
| MODALITY                           | .331           | 1  | .331        | 17.236 | .000 | .301     |
| MODALITY * GROUP                   | .005           | 1  | .005        | .282   | .598 | .007     |
| Error(MODALITY)                    | .769           | 40 | .019        |        |      |          |
| TEST * POLARITY                    | .090           | 1  | .090        | 1.990  | .166 | .047     |
| TEST * POLARITY * GROUP            | .024           | 1  | .024        | .517   | .476 | .013     |
| Error(TEST*POLARITY)               | 1.817          | 40 | .045        |        |      |          |
| TEST * MODALITY                    | .032           | 1  | .032        | 1.394  | .245 | .034     |
| TEST * MODALITY * GROUP            | .001           | 1  | .001        | .054   | .817 | .001     |
| Error(TEST*MODALITY)               | .924           | 40 | .023        |        |      |          |
| POLARITY * MODALITY                | .046           | 1  | .046        | 1.367  | .249 | .033     |
| POLARITY * MODALITY * GROUP        | .038           | 1  | .038        | 1.141  | .292 | .028     |
| Error(POLARITY*MODALITY)           | 1.345          | 40 | .034        |        |      |          |
| TEST * POLARITY * MODALITY         | .054           | 1  | .054        | 3.390  | .073 | .078     |
| TEST * POLARITY * MODALITY * GROUP | .000           | 1  | .000        | .023   | .881 | .001     |
| Error(TEST*POLARITY*MODALITY)      | .640           | 40 | .016        |        |      |          |
